# Supplementary material for: Rhombohedral/Cubic In2O3 Phase Junction Hybridized with Polymeric Carbon Nitride for Photodegradation of Organic Pollutants
Source: MDPI journal article supplement (doi:10.3390/ijms232214293), 2022-11-18
Supplement: s1 [file s1]

# **Rhombohedral corundum/cubic In<sub>2</sub>O<sub>3</sub> phase-junction hybridized with Polymeric Carbon Nitride for Photodegradation of Organic Pollutants**

**Xiaorong Cai <sup>1,+</sup>, Yaning Wang <sup>1</sup>, Feng Lin <sup>2,\*</sup>, Shuting Tang <sup>1</sup>, Liuye Mo <sup>1</sup>, Yixian Zang <sup>1</sup>, Zhe Leng <sup>1,\*</sup>, Fei Jing <sup>1,+</sup>, Shaohong Zang <sup>1,\*</sup>**

## Methods

### 1.1 Preparation of MIL-68(In)-NH<sub>2</sub>

The precursor MIL-68(In)-NH<sub>2</sub> was prepared by a hydrothermal method. Typically, 1.3 mmol 2-aminoterephthalic acid and 3.8 mmol In(NO<sub>3</sub>)<sub>3</sub>·xH<sub>2</sub>O were dissolved in 6.2 mL DMF, respectively. The solutions were mixed under continuously stirring. Then the mixture solution was transferred into an autoclave and reacted at 125 °C for 5 h in an oven. After the reaction ended, the resulting products were collected and washed with methanol several times. Finally, the collected MIL-68(In)-NH<sub>2</sub> sample was dried at 80 °C overnight.

### 1.2 Preparation of MIO/PCN and PCN

MIO/PCN samples were obtained by an in-situ method. Certain amounts of MIL-68(In)-NH<sub>2</sub> (5, 10, 20 mg) and 12 g urea were mixed in a glass bottle with a little bit of distilled water and stirred at 80 °C until the water evaporated completely. The obtained solid was transferred into a crucible and calcined at 500 °C with 2 °C min<sup>-1</sup> in a muffle furnace. After reaction for 2 h, the products were collected and named *x wt%* MIO/PCN, where *x* means the calculated conversion rate of MIO.

Pure PCN was synthesized in the same condition without the addition of MIL-68(In)-NH<sub>2</sub>.

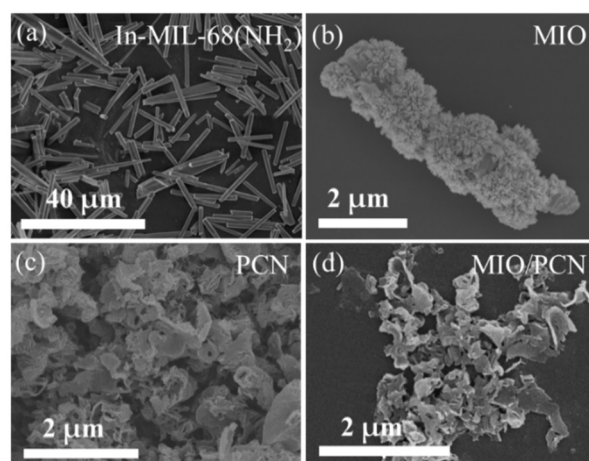

**Figure S1.** SEM images of (a) In-MIL-68(NH<sub>2</sub>), (b) MIO, (c) PCN, (d) 2.5 wt% MIO/PCN samples.

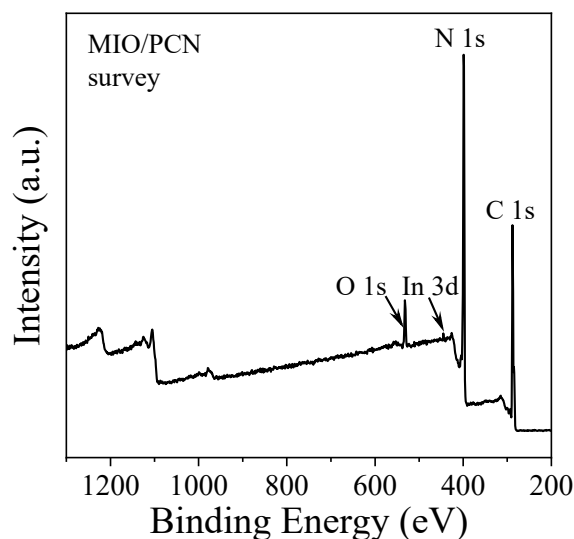

**Figure S2.** Survey XPS spectra of 2.5 wt% MIO/PCN samples.
